# Supplementary material for: W exsolution promotes the in situ reconstruction of a NiW electrode with rich active sites for the electrocatalytic oxidation of 5-hydroxymethylfurfural (HMF)
Source: Royal Society of Chemistry journal article supplement (doi:10.1039/d2cy00384h), 2022-01-01
Supplement: d2cy00384h1.pdf [file d2cy00384h1.pdf]

## Supporting Information

# W Exsolution Promotes the In-situ Reconstruction of NiW Electrode with Rich Active Sites for Electrocatalytic Oxidation of 5-hydroxymethylfurfural

Gang Xu<sup>a,b</sup>, Chenyu Chen<sup>a,b,c</sup>, Mengxia Li<sup>a,b,c</sup>, Xinyi Ren<sup>d</sup>, Lianggao Hu<sup>c</sup>, Chengrong Wu<sup>c</sup>, Yu Zhuang<sup>c</sup>,  
Fan Wang<sup>\*c</sup>

<sup>a</sup> *Fujian Provincial Key Laboratory of Advanced Materials Oriented Chemical Engineering, College of Chemistry and Material Science, Fujian Normal University, Fuzhou 350007, China*

<sup>b</sup> *Fujian Provincial Key Laboratory of Polymer Materials, College of Chemistry and Materials Science, Fujian Normal University, Fuzhou 350007, China.*

<sup>c</sup> *Fujian Eco-materials Engineering Research Center, School of Ecological Environment and Urban Construction, Fujian University of Technology, Fuzhou 350118, China*

<sup>d</sup> *Dalian Institute of Chemical Physics, Chinese Academy of Sciences, 457 Zhongshan Road, Dalian 116023, China*

\* Corresponding author: fanan\_wang@fjut.edu.cn (F.N. Wang)

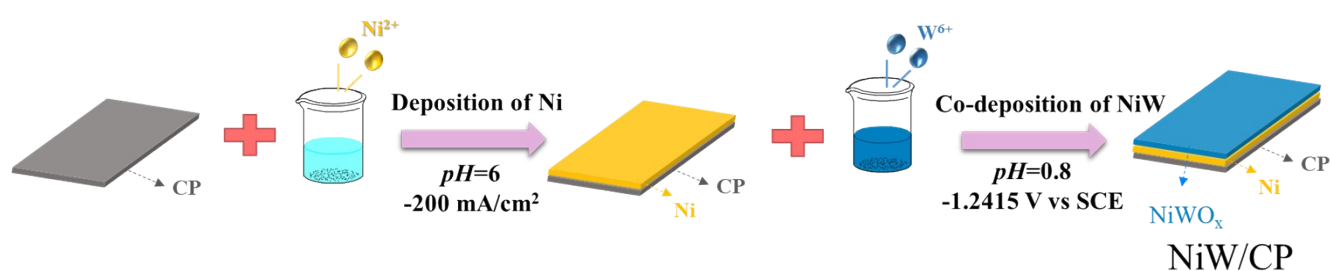

**Scheme S1** The scheme of the fabrication procedures for NiW/CP.

**Notes:** The NiW/CP electrode was fabricated by a simple two-step electro-deposition. The first step was for the deposition of Ni base on the CP substrate (Ni-CP), and then the second was for the co-deposition of NiW layer on the Ni-CP substrate. This could be inferred from the ICP-MS results in **Table S1 and S2**. About  $18.6 \mu\text{g/mL}$  Ni was dissolved after the Ni/CP was immersed in the second-step electrolyte for 5 mins, while much fewer Ni ( $2.1 \mu\text{g/mL}$ ) was found in the electrolyte after 5-min cathodic deposition with W source. Moreover, the Ni in the samples from the electrolytes after the second electro-deposition without W source for Ni-2/CP ( $15.8 \mu\text{g/mL}$ ) was close to that after immersed, indicating that the Ni along cannot be deposited under the condition of second deposition without W. The amount of Ni ( $28.5 \text{ mg/mg}$ ) and W ( $1.8 \text{ mg/mg}$ ) on the NiW/CP was close to Ni ( $29.5 \text{ mg/mg}$ ) on Ni/CP and W ( $1.9 \text{ mg/mg}$ ) on the W/CP, respectively, confirming the co-deposition of NiW layer in the second deposition step.

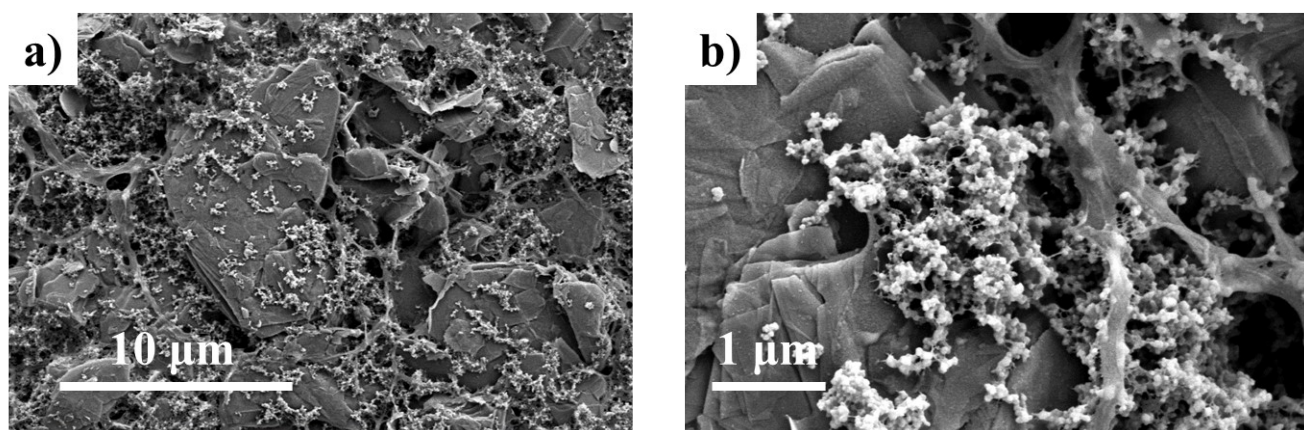

**Fig. S1** SEM images of CP.

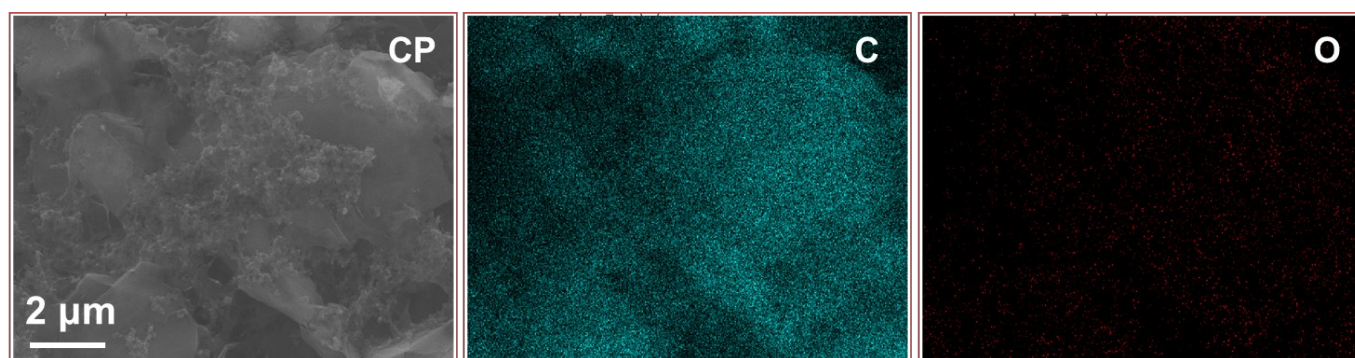

**Fig. S2** EDS-mapping images of CP.

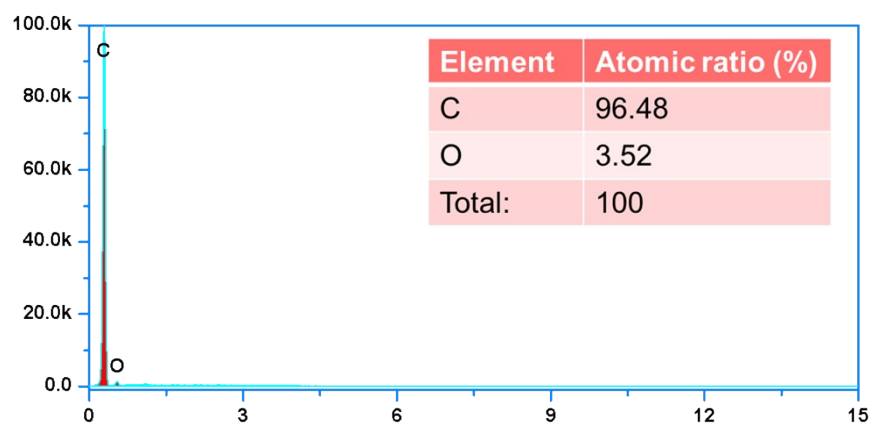

**Fig. S3** Element compositions of CP from SEM-EDS analysis. The only detected elements were C and O on the surface of CP.

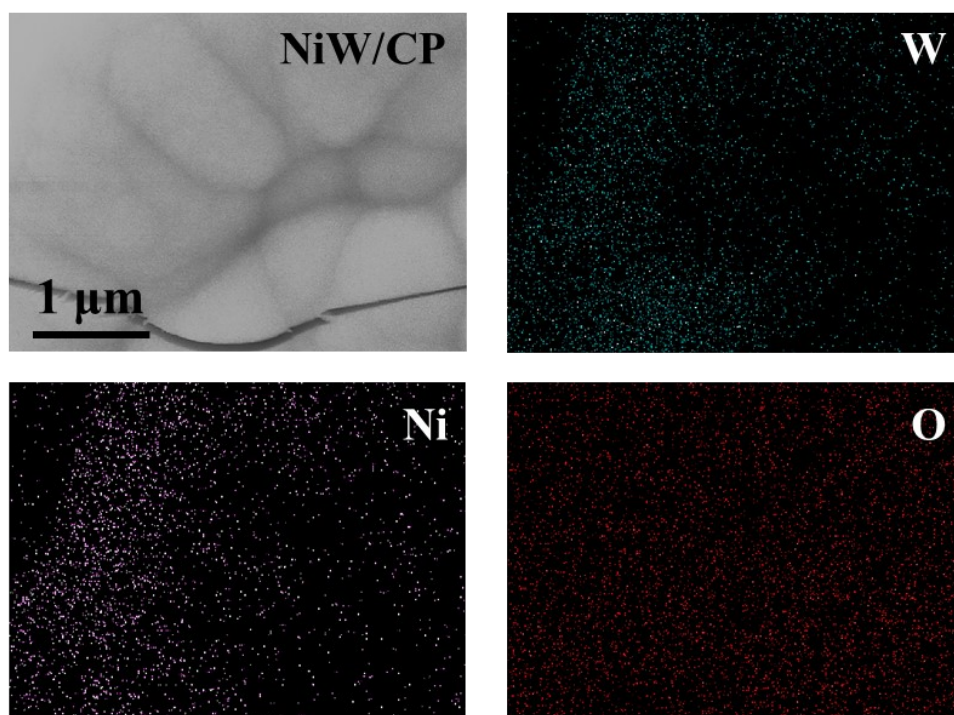

**Fig. S4** EDS-mapping images of NiW/CP.

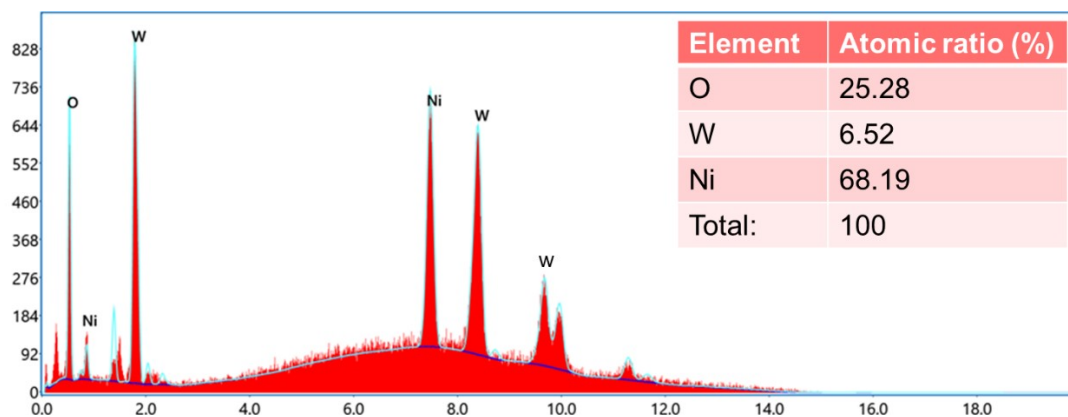

**Fig. S5** Element compositions of the NiW/CP from SEM-EDS analysis. The atomic ratio of Ni/W is 10.5.

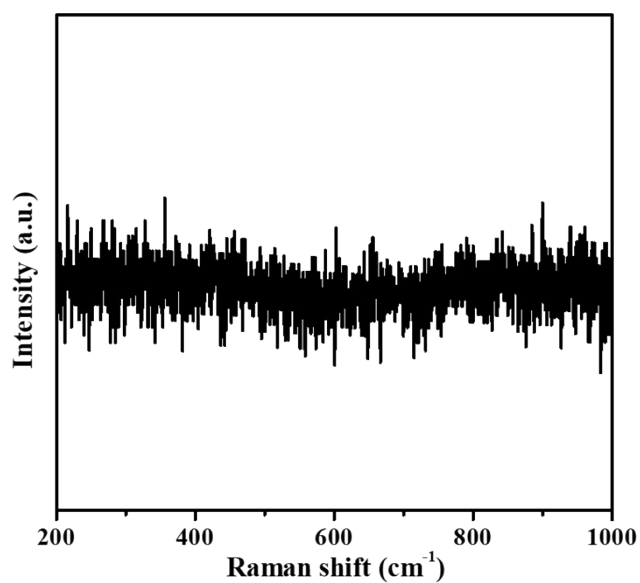

**Fig. S6** Raman spectrum of Ni/CP.

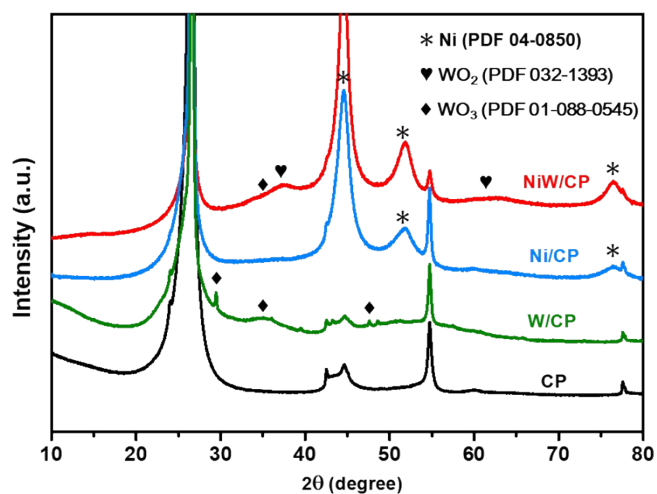

**Fig. S7** XRD spectra of NiW/CP, Ni/CP, W/CP and CP.

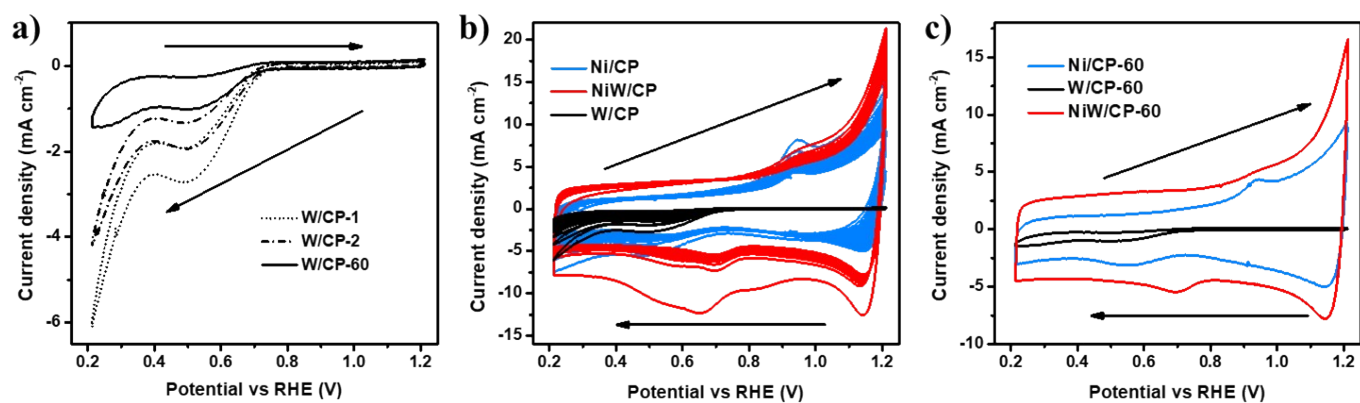

**Fig. S8** CV plots of different cycles for W/CP, Ni/CP and NiW/CP in 1 M KOH.

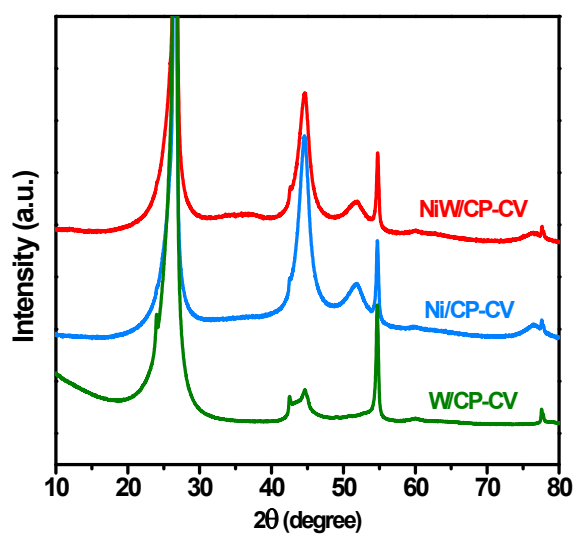

**Fig. S9** XRD spectra of NiW/CP, Ni/CP and W/CP after CV stabilization.

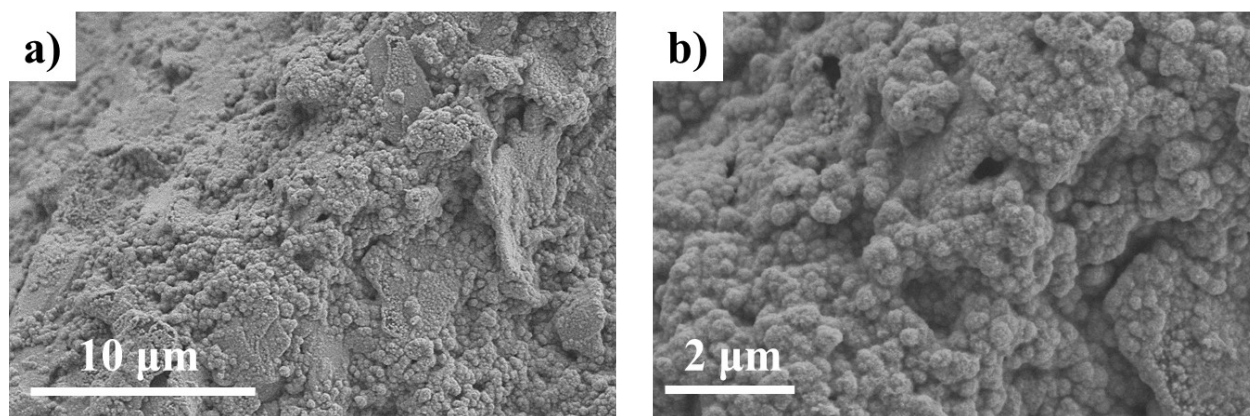

**Fig. S10** SEM images of Ni/CP after CV scan, with almost unchanged morphology by comparison to the as-prepared Ni/CP.

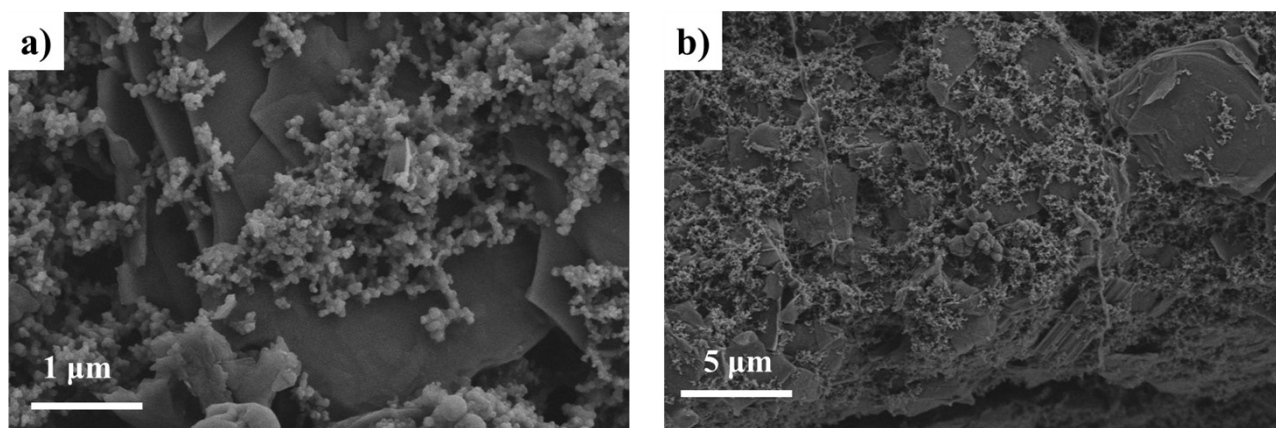

**Fig. S11** SEM images of W/CP after CV scan. The W layer was basically lost, with the morphology of CP substrate visible.

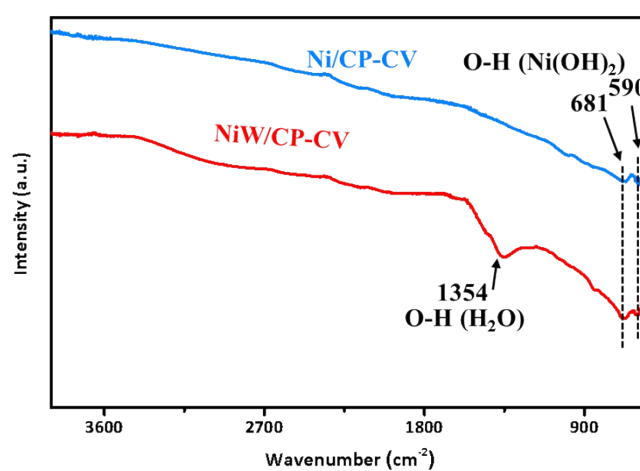

**Fig. S12** The ATR-FTIR spectra of Ni/CP and NiW/CP after CV stabilization.

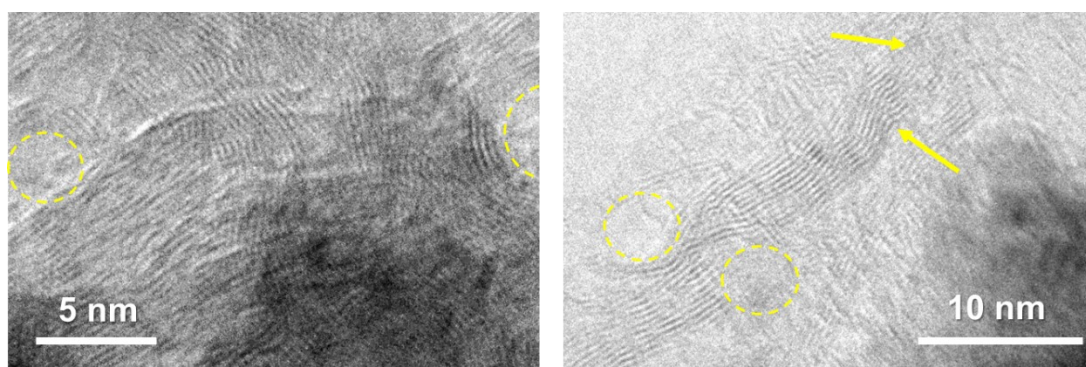

**Fig. S13** TEM images from different area of NiW/CP after CV stabilization

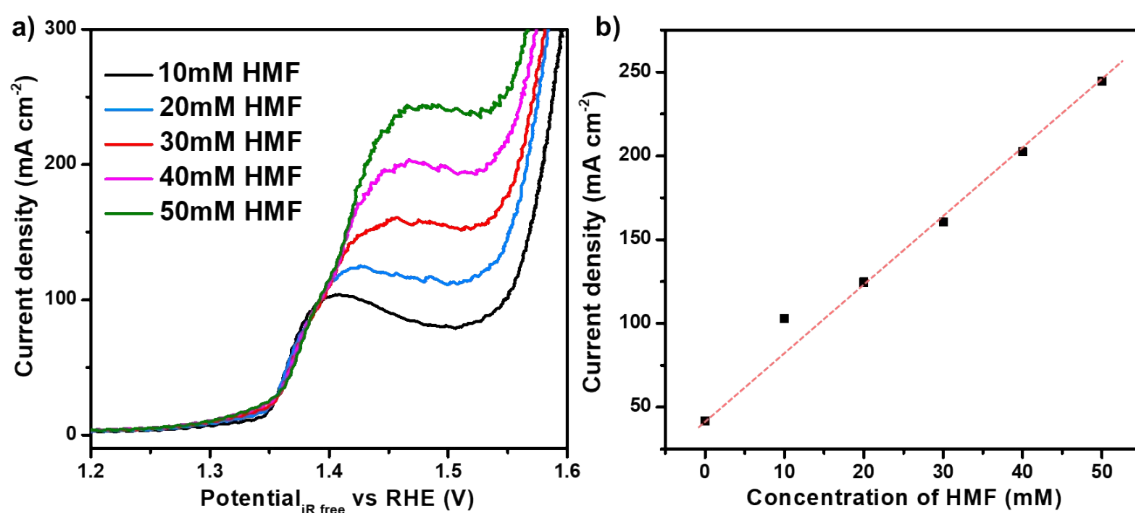

**Fig. S14** a) The LSVs of NiW/CP in 1 M KOH solution with different concentrations of HMF; b) the variation of the summit current density before 1.5 V with the concentration of HMF.

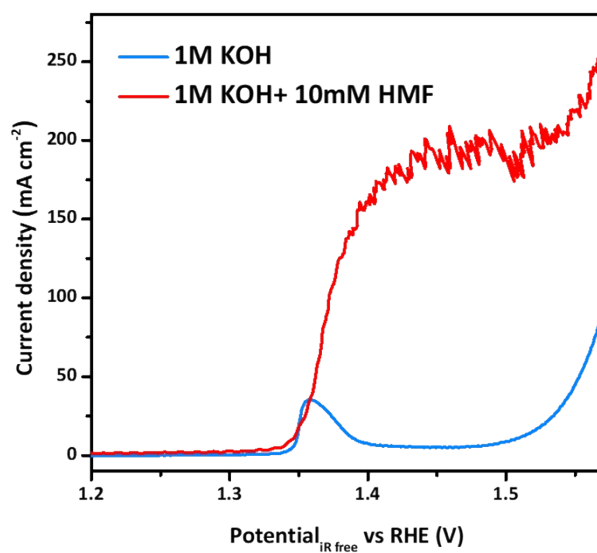

**Fig. S15** LSVs on NiW/NF in 1 M KOH solution with and without 10 mM HMF.

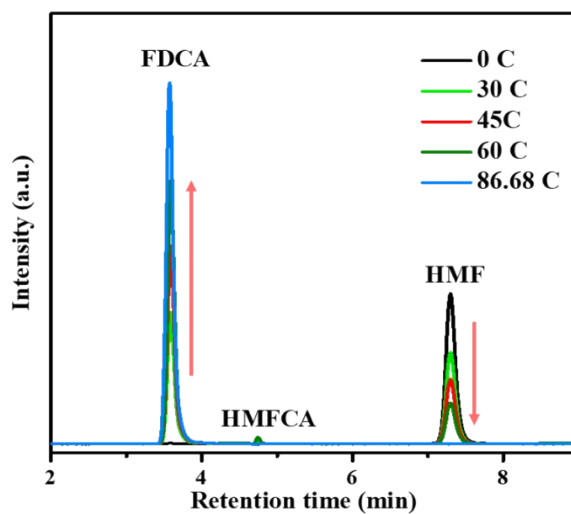

**Fig. S16** HPLC chromatogram over charges on NiW/CP in 1 M KOH with 5 mM HMF.

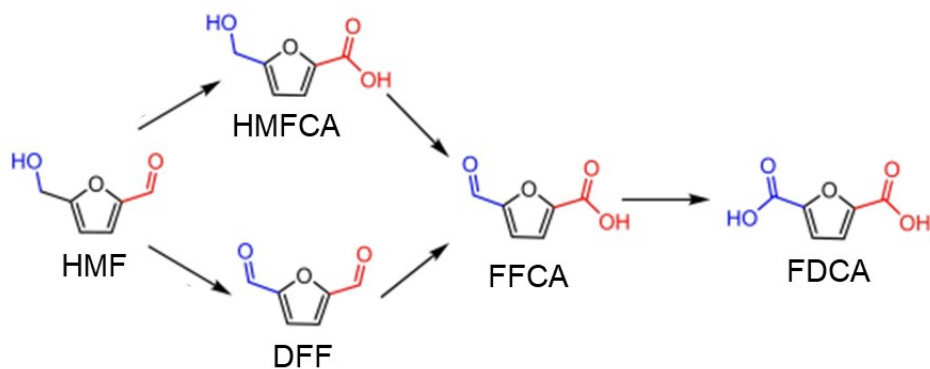

**Fig. S17** Reaction route for HMF to FDCA.

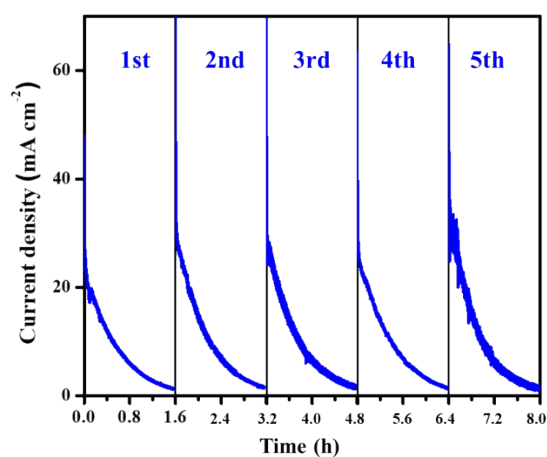

**Fig. S18** Current-time curves in 5 successive runs on NiW/CP in separated 30 mL 1 M KOH with 5 mM HMF.

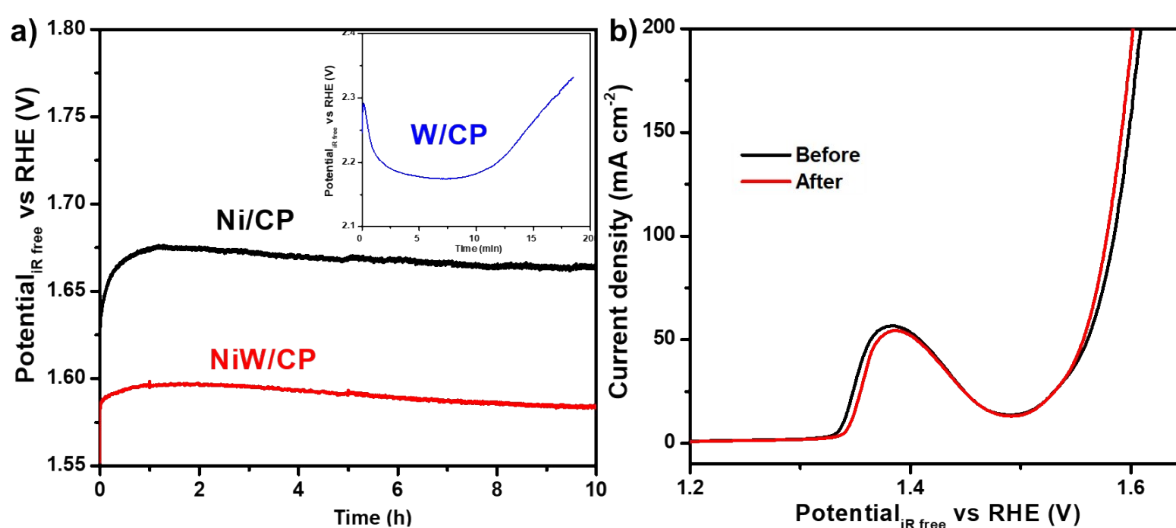

**Fig. S19** a) The long-time stability test for NiW/CP, Ni/CP and W/CP in 1 M KOH at a current density of  $100 \text{ mA cm}^{-2}$ ; b) the LSVs of NiW/CP in separated solutions of 1 M KOH before and after 10 h stability test.

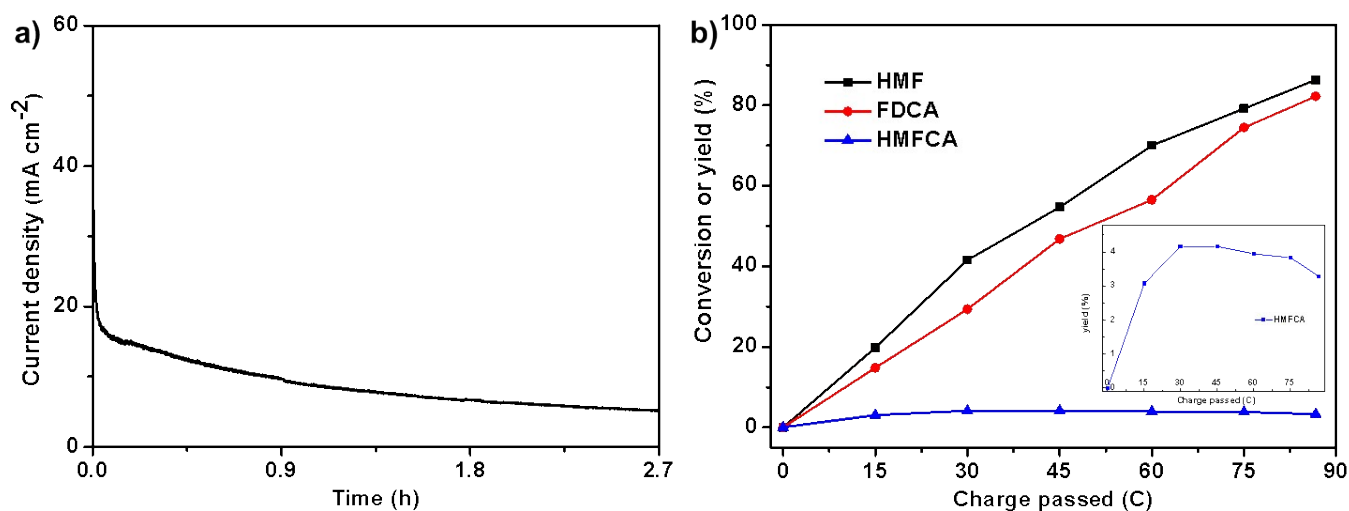

**Fig. S20** a) The current-time curve and b) the conversion of HMF or yield of FDCA and HMFCa on Ni/CP in 30 mL 1 M KOH with 5 mM HMF. It took over 2.7 h to pass 86.68 C charge on Ni/CP, with only 81% HMF conversion and 78% FDCA yield.

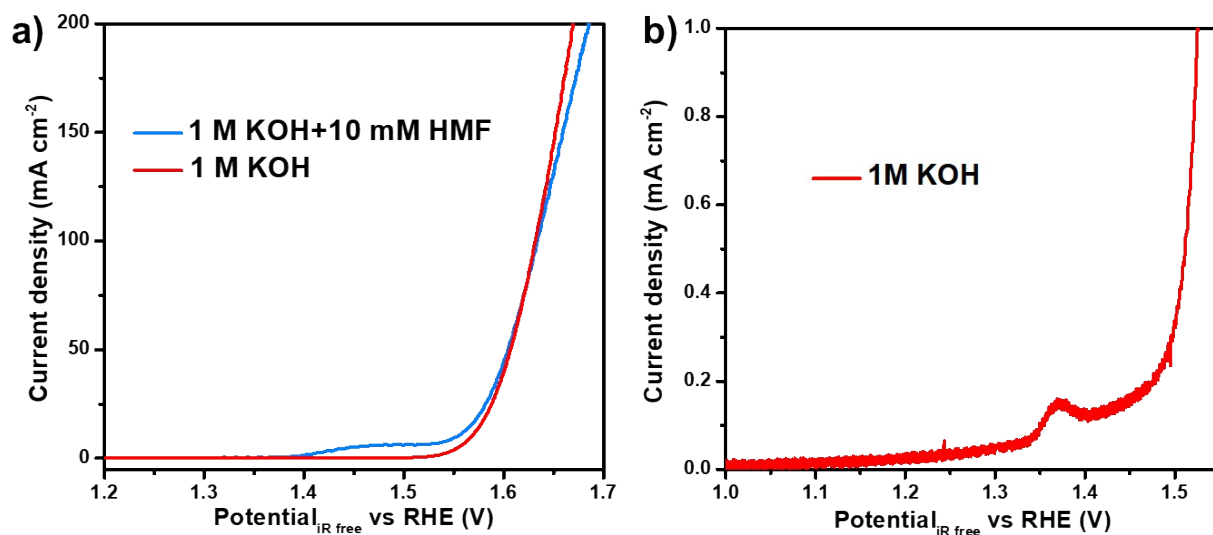

**Fig. S21** a) LSVs on Ni-2/CP in 1 M KOH solution with 10 mM HMF; b) the enlarged plot of a) from 1.0 V to 1.55 V.

**Notes:** The Ni-2/CP electrode was fabricated by the two electro-deposition steps but without W source. As discussed before, the Ni base after the first deposition was dissolved by the acidic solution in the second electrodeposition, and could be co-deposited back with the W source. While without the W source, the dissolved Ni ion could not be re-deposited, as indicated by the ICP results in Table S1 that the Ni in the solution after the second deposition of Ni-2/CP was far more than that of NiW/CP. The dramatic wastage of Ni on the Ni-2/CP was further supported by the much lower oxidation peak from the LSV in 1 M KOH solution in Fig. S17 b), and was ascribed to its much poorer activity.

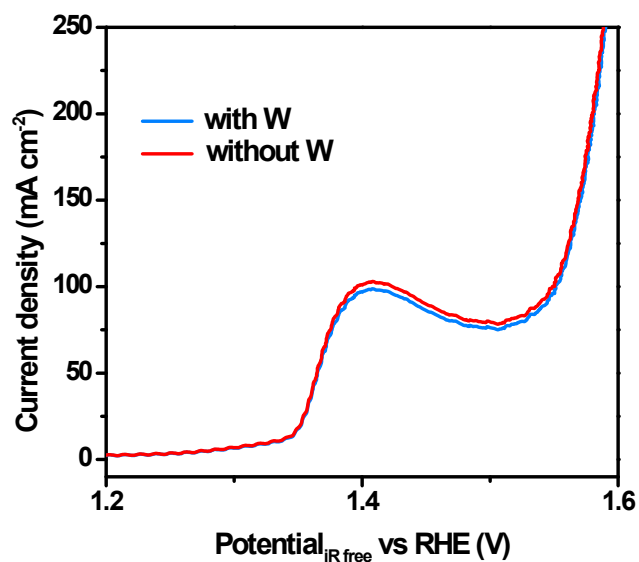

**Fig. S22** LSVs on NiW/CP in 1 M KOH solution with 10 mM HMF with or without W (17  $\mu\text{g/mL}$ ) dissolved.

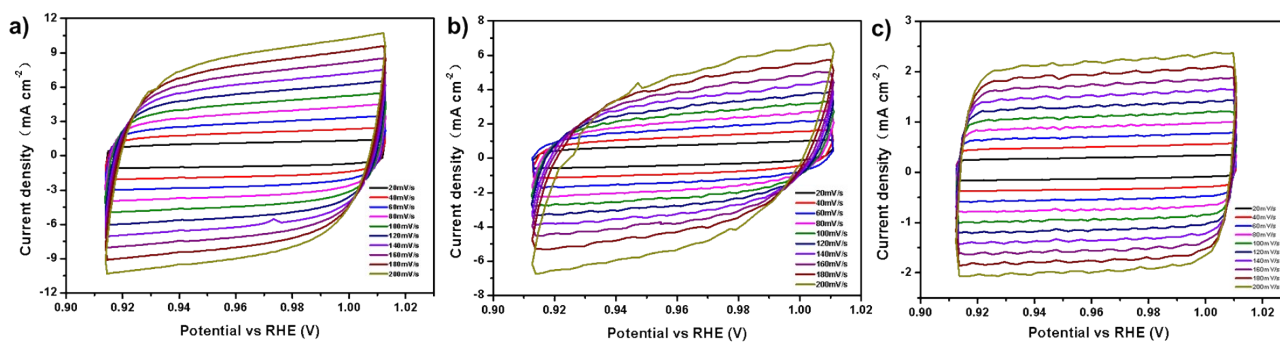

**Fig. S23** The CV between 0.91 and 1.01 V (vs RHE) at different scan rate from 20 to 200  $\text{mV}\cdot\text{s}^{-1}$  for a) NiW/CP, b) Ni/CP and c) W/CP

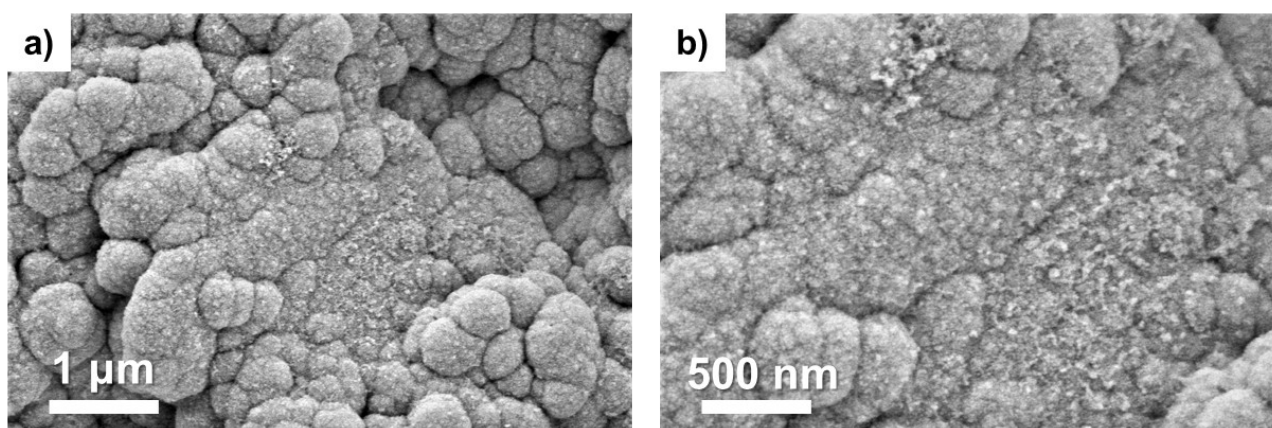

**Fig. S24** a, b) SEM images of NiW/CP after CV (before HMFOR).

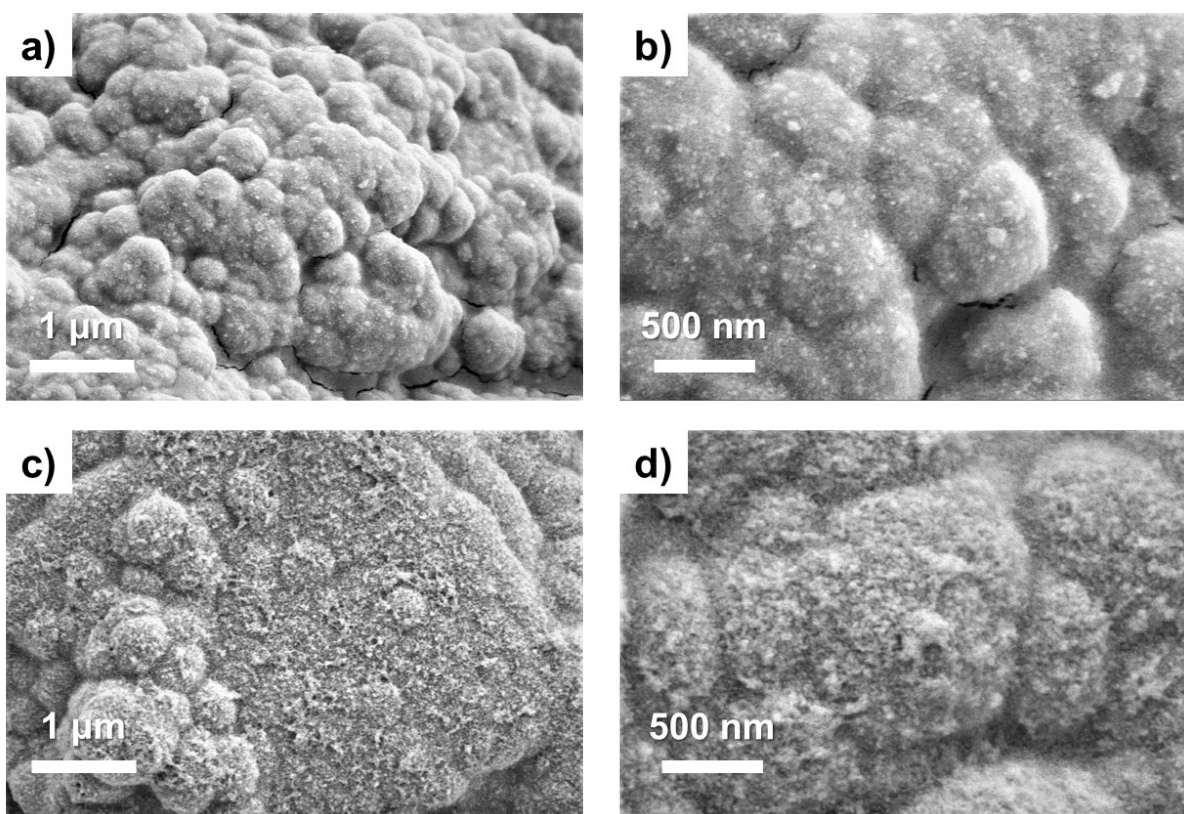

**Fig. S25** SEM images of Ni/CP a, b) after CV (before HMFOR) and c, d) after HMFOR.

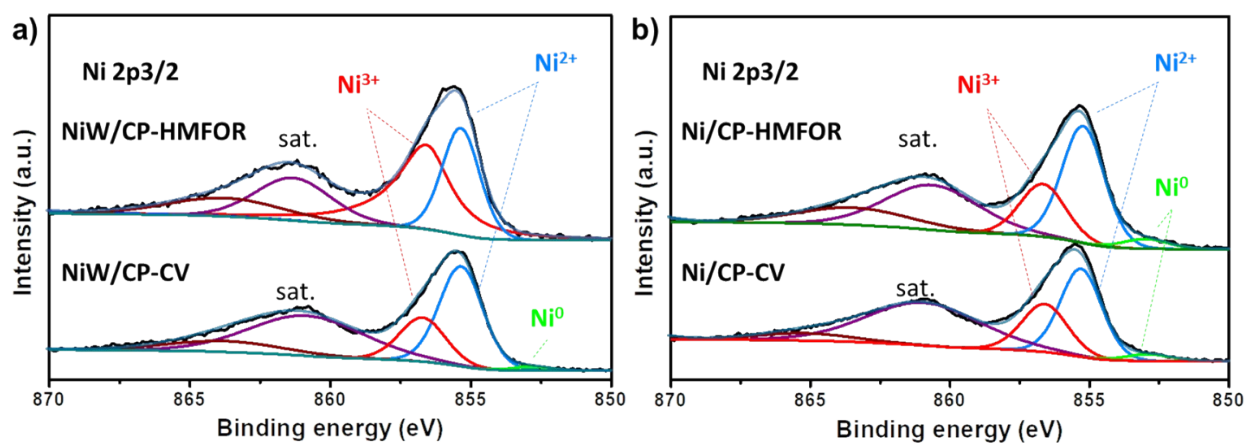

**Fig. S26** XPS spectra of Ni  $2p_{3/2}$  before and after HMFOR for a) NiW/CP and b) Ni/CP.

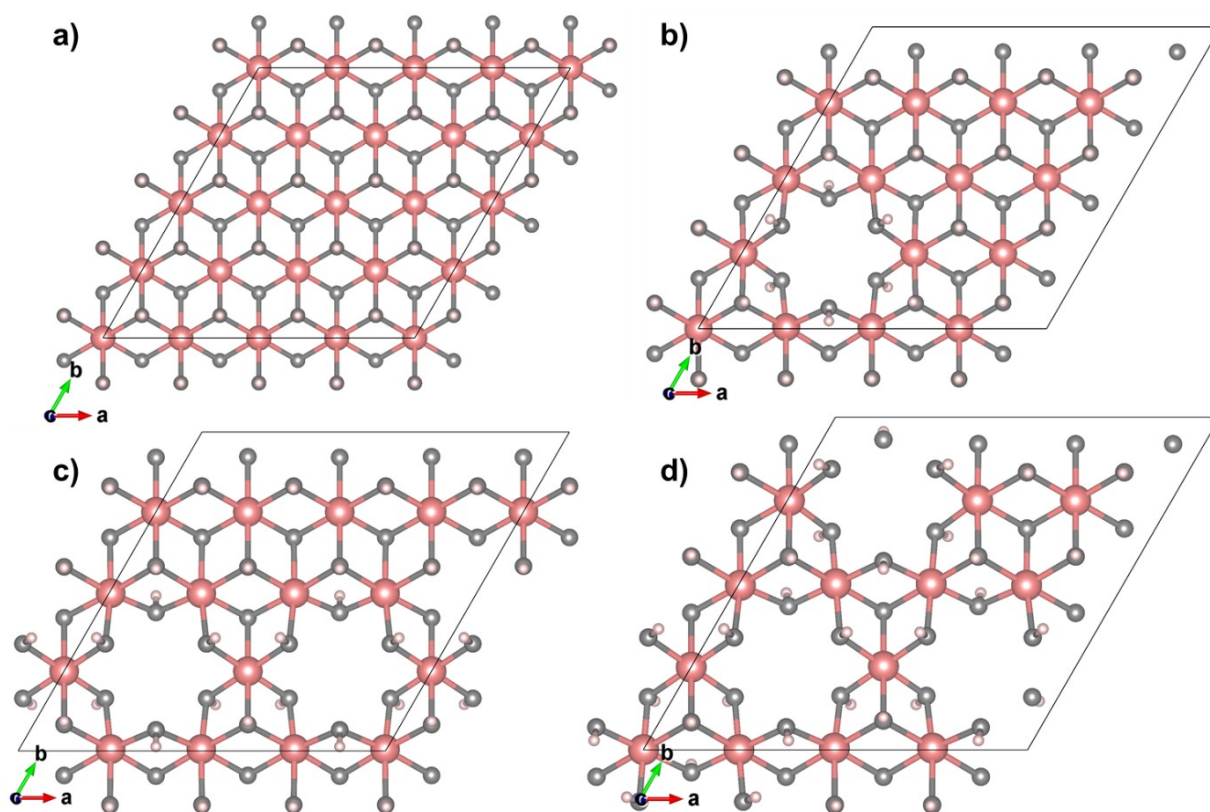

**Fig. S27** Top view of a) the pristine Ni(OH)<sub>2</sub>, and the Ni<sub>1-x</sub>(OH)<sub>2</sub> with b) one Ni vacancy (x=0.0625), c) two Ni vacancies (x=0.125), d) three Ni vacancies (x=0.1875). The Ni, O, H atoms were represented with dark pink, grey and light pink balls, respectively.

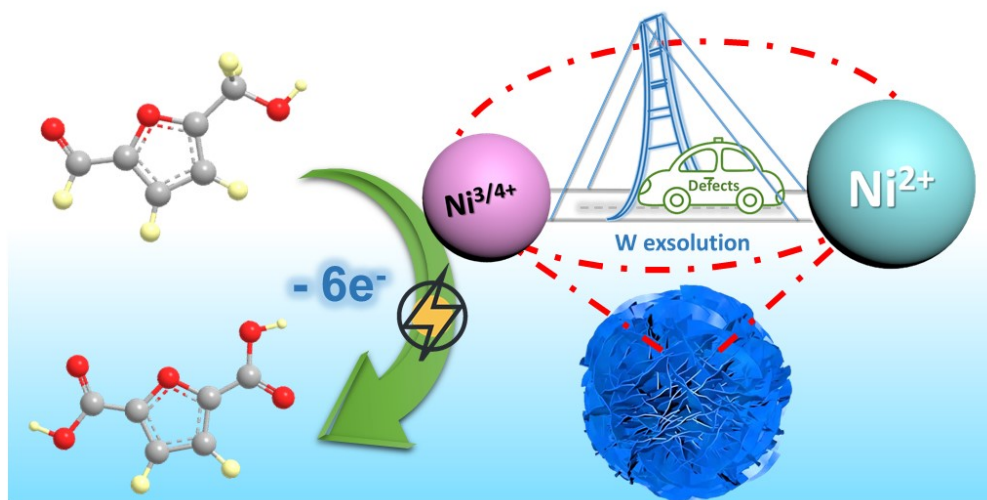

**Scheme S2** The promotion of W exsolution from the NiW layer on the formation of high-valence Ni sites with superior activity towards HMFOR.

**Table S1** The concentrations of Ni or W collected from diffirenet electrolytes by ICP-MS. Specifically, NiW/CP-de or Ni-2/CP-de represented the samples from the electrolytes after the second electro-deposition with or without W source for NiW/CP or Ni-2/CP, respectively. Ni/CP-im represented the sample from the electrolytes of second electro-deposition with Ni/CP immersed for 5 min. The NiW/CP, Ni/CP and W/CP under columns of CV-x (x=1, 2, 10 and 60) represented the samples from the 1 M KOH electrolyte after x cycyles of CV on the NiW/CP, Ni/CP and W/CP, respectively.

|            | Ni ( $\mu\text{g/mL}$ ) |                 |                 |                 | W ( $\mu\text{g/mL}$ ) |                  |                  |                  |
|------------|-------------------------|-----------------|-----------------|-----------------|------------------------|------------------|------------------|------------------|
| NiW/CP-de  | $2.13 \pm 0.05$         |                 |                 |                 | $4.53 \pm 0.01$        |                  |                  |                  |
| Ni/CP-im   | $18.57 \pm 0.04$        |                 |                 |                 | $4.57 \pm 0.03$        |                  |                  |                  |
| Ni-2/CP-de | $15.76 \pm 0.05$        |                 |                 |                 | -                      |                  |                  |                  |
|            | CV-1                    | CV-2            | CV-10           | CV-60           | CV-1                   | CV-2             | CV-10            | CV-60            |
| NiW/CP     | $0.03 \pm 0.01$         | $0.07 \pm 0.01$ | $0.17 \pm 0.02$ | $0.37 \pm 0.03$ | $10.71 \pm 0.05$       | $14.53 \pm 0.06$ | $16.74 \pm 0.05$ | $17.18 \pm 0.04$ |
| Ni/CP      | $0.05 \pm 0.01$         | $0.08 \pm 0.01$ | $0.25 \pm 0.03$ | $0.53 \pm 0.03$ | -                      | -                |                  | -                |
| W/CP       | -                       | -               | -               | -               | $15.63 \pm 0.06$       | $17.72 \pm 0.03$ | $18.91 \pm 0.05$ | $19.07 \pm 0.04$ |

**Table S2** The weight percentage of Ni or W collected in one piece of modified CP for NiW/CP, Ni/CP and W/CP by ICP-MS. The columns of fresh, CV-60 and HMFOR-5 cycles represented the samples as-prepared, after 60 cycles of CV and after 5 successive runs of HMFOR, respectively. Each data was repeated for 3 times with 3 different pieces of modified CP.

|        | Ni (wt. %)       |                  |                  | W (wt. %)       |                 |                 |
|--------|------------------|------------------|------------------|-----------------|-----------------|-----------------|
|        | fresh            | CV-60            | HMFOR-5 cycles   | fresh           | CV-60           | HMFOR-5 cycles  |
| NiW/CP | $28.51 \pm 0.03$ | $28.43 \pm 0.05$ | $28.12 \pm 0.02$ | $1.82 \pm 0.05$ | under detection | under detection |
| Ni/CP  | $29.47 \pm 0.05$ | $28.79 \pm 0.05$ | $28.85 \pm 0.06$ | -               | -               | -               |
| W/CP   | -                |                  | -                | $1.94 \pm 0.05$ | under detection | under detection |

**Table S3** The comparisons of electro-chemical performance among this work and reported electrode. All the performance were tested in 1 M KOH at 25 °C, with 10 mM HMF for LSV, unless otherwise noted.

| Catalyst                           | Electrode substrate | LSV performance<br>potentail ( $V_{RHE}$ ) / current<br>density ( $\text{mA cm}^{-2}$ ) | Chronoamperometry performance |                                     |                        |           |                   |           |
|------------------------------------|---------------------|-----------------------------------------------------------------------------------------|-------------------------------|-------------------------------------|------------------------|-----------|-------------------|-----------|
|                                    |                     |                                                                                         | Total<br>charge (C)           | Reaction<br>potential ( $V_{RHE}$ ) | Reaction time<br>(min) | FE<br>(%) | FDCA<br>yield (%) | Cycl<br>e |
| This work<br>NiW                   | CP                  | 1.27 / onset<br>1.36 / 10<br>1.38 / 80                                                  | 86.68                         | 1.38                                | 96                     | 95.5      | 95.6              | 5         |
|                                    | NF                  | 1.38 / 150                                                                              | -                             |                                     |                        |           |                   |           |
| Ni nanosheet <sup>1</sup>          | CP                  | 1.33 / onset <sup>a</sup><br>1.4 / 10 <sup>a</sup>                                      | 43.3                          | 1.36                                | 60                     | ~95       | 99.4              | 3         |
| Ni <sub>x</sub> B <sup>2</sup>     | NF                  | 1.40 / onset<br>1.45 / 100                                                              | 58.2                          | 1.45                                | 30                     | ~100      | 98.5              | -         |
| NiSe@NiO <sub>x</sub> <sup>3</sup> | NF                  | 1.35 / onset<br>1.36 / 240                                                              | 58                            | 1.423                               | -                      | 99        | ~100              | 6         |
| Ni <sub>3</sub> N@C <sup>4</sup>   | NF                  | 1.38 / 50                                                                               | 174                           | 1.45                                | -                      | 99.0      | 98                | 6         |
| S-Ni@C <sup>5</sup>                | Carbon Cloth        | 1.35 / onset<br>1.47 / 40                                                               | 86.84                         | 1.473                               | 270                    | 96        | 96                | 5         |
| NiCoBDC <sup>6,b</sup>             | NF                  | 1.54 / 10                                                                               | -                             | 1.55                                | 240                    | 78.8      | 99                | 4         |
| NiFe LDH <sup>7</sup>              | CP                  | 1.25 / onset<br>1.32 / 20                                                               | 57.79                         | 1.33                                | 90                     | 98.6      | 98                | 4         |
| NiCoFe LDH <sup>8,c,d</sup>        | CP                  | 1.51 / 20                                                                               | -                             | 1.52                                | 60                     | -         | 81.6              | -         |
| CoO-CoSe <sub>2</sub> <sup>9</sup> | NF                  | 1.3 / onset<br>1.4 / 50 <sup>a</sup>                                                    | 86.68                         | 1.43                                | 57                     | 97.9      | 99                | 5         |
| CoNW <sup>10</sup>                 | NF                  | 1.311 / 10<br>1.764 / 100                                                               | 289.5                         | 1.469                               | -                      | 96.6      | 98                | 5         |
| NiCoMn<br>LDH <sup>11,c,e</sup>    | NF                  | 1.42 / onset<br>1.58 / 50                                                               | 20.3                          | 1.5                                 | 150                    | 65        | 91.7              | 4         |

|                                  |         |                          |      |      |     |    |      |   |
|----------------------------------|---------|--------------------------|------|------|-----|----|------|---|
| <b>Cu<sub>x</sub>S@NiCo LDH</b>  | Cu foam | 1.3 / 87<br>1.35 / 180.6 | 57.6 | 1.32 | ~75 | 99 | 99   | 5 |
| <b>t-NiCo-MOF<sup>12,f</sup></b> | NF      | 1.4 / 600~730            | 57.8 | -    | ~66 | 98 | ~100 | 5 |

<sup>a</sup> The data were evaluated from the corresponding LSV curves.

<sup>b</sup> Basic solution was 0.1 M KOH.

<sup>c</sup> Basic solution was 1 M NaOH.

<sup>d</sup> The chronoamperometry test was conducted at 65 °C.

<sup>e</sup> The chronoamperometry test was conducted at 35 °C.

<sup>f</sup> The HMF concentration was 50 mM for LSV test.

**Table S4** Detailed deconvolution data of the Ni 2p<sub>3/2</sub> for Ni/CP and NiW/CP before and after HMFOR from XPS.

|                  | Binding energy (eV) | Atomic content (%) |        |             |              |
|------------------|---------------------|--------------------|--------|-------------|--------------|
|                  |                     | Ni/CP              | NiW/CP | Ni/CP-HMFOR | NiW/CP-HMFOR |
| Ni <sup>0</sup>  | 852.9 ± 0.1         | 4.9                | 2.2    | 5.6         | 0            |
| Ni <sup>2+</sup> | 855.3 ± 0.1         | 59.4               | 61.3   | 63.5        | 39.6         |
| Ni <sup>3+</sup> | 856.6 ± 0.1         | 35.7               | 36.5   | 30.9        | 60.4         |

**Table S5** The total energy ( $E_{\text{tot}}$ ) of NiOOH, H<sub>2</sub>O, H<sub>2</sub>, and Ni<sub>1-x</sub>(OH)<sub>2</sub> (x=0, 0.0625, 0.1250, 0.1875) and the formation energy ( $E_f$ ) from Ni<sub>1-x</sub>(OH)<sub>2</sub> to NiOOH from the DFT calculations.

| Item                                            | $E_{\text{tot}}$ (eV) | $E_{\text{tot}}$ (eV)/unit | $E_f$ (eV) |
|-------------------------------------------------|-----------------------|----------------------------|------------|
| NiOOH                                           | -343.381              | -21.4613                   |            |
| H <sub>2</sub> O                                | -14.225               |                            |            |
| H <sub>2</sub>                                  | -6.758                |                            |            |
| Ni <sub>1-x</sub> (OH) <sub>2</sub> , x=0.0000  | -423.424              | -26.4640                   | 2.45       |
| Ni <sub>1-x</sub> (OH) <sub>2</sub> , x =0.0625 | -415.737              | -25.9836                   | 1.05       |
| Ni <sub>1-x</sub> (OH) <sub>2</sub> , x =0.1250 | -408.529              | -25.5331                   | -0.31      |
| Ni <sub>1-x</sub> (OH) <sub>2</sub> , x =0.1875 | -401.426              | -25.0891                   | -1.67      |

## Reference

1. X. Lu, K. H. Wu, B. Zhang, J. Chen, F. Li, B. J. Su, P. Yan, J. M. Chen and W. Qi, *Angew. Chem. Int. Ed. Engl.*, 2021, **60**, 14528-14535.
2. S. Barwe, J. Weidner, S. Cychy, D. M. Morales, S. Dieckhofer, D. Hiltrop, J. Masa, M. Muhler and W. Schuhmann, *Angew. Chem. Int. Ed. Engl.*, 2018, **57**, 11460-11464.
3. L. Gao, Z. Liu, J. Ma, L. Zhong, Z. Song, J. Xu, S. Gan, D. Han and L. Niu, *Appl. Catal. B-Environ.*, 2020, **261**.
4. N. Zhang, Y. Zou, L. Tao, W. Chen, L. Zhou, Z. Liu, B. Zhou, G. Huang, H. Lin and S. Wang, *Angew. Chem. Int. Ed. Engl.*, 2019, **58**, 15895-15903.
5. F. Kong and M. Wang, *ACS Appl. Energ. Mater.*, 2021, **4**, 1182-1188.
6. M. Cai, Y. Zhang, Y. Zhao, Q. Liu, Y. Li and G. Li, *J. Mater. Chem. A*, 2020, **8**, 20386-20392.
7. W.-J. Liu, L. Dang, Z. Xu, H.-Q. Yu, S. Jin and G. W. Huber, *ACS Catal.*, 2018, **8**, 5533-5541.
8. M. Zhang, Y. Liu, B. Liu, Z. Chen, H. Xu and K. Yan, *ACS Catal.*, 2020, **10**, 5179-5189.
9. X. Huang, J. L. Song, M. L. Hua, Z. B. Xie, S. S. Liu, T. B. Wu, G. Y. Yang and B. X. Han, *Green Chem.*, 2020, **22**, 843-849.
10. Z. Zhou, C. Chen, M. Gao, B. Xia and J. Zhang, *Green Chem.*, 2019, **21**, 6699-6706.
11. B. Liu, S. Xu, M. Zhang, X. Li, D. Decarolis, Y. Liu, Y. Wang, E. K. Gibson, C. R. A. Catlow and K. Yan, *Green Chem.*, 2021, **23**, 4034-4043.
12. X. Deng, M. Li, Y. Fan, L. Wang, X.-Z. Fu and J.-L. Luo, *Appl. Catal. B-Environ.*, 2020, **278**, 119339-119353.
